# Supplementary material for: Neonatal nephron loss during active nephrogenesis – detrimental impact with long-term renal consequences
Source: PubMed Central journal article supplement (PMC5852238; doi:10.1038/s41598-018-22733-8), 2018-03-14

1           **Neonatal nephron loss during active nephrogenesis -**  
2           **detrimental impact with long-term renal consequences**

3  
4 Carlos Menendez-Castro<sup>#</sup>, Dörte Nitz<sup>#</sup>, Nada Cordasic<sup>§</sup>, Jutta Jordan<sup>+</sup>, Tobias Bäuerle<sup>+</sup>,  
5 Fabian B. Fahlbusch<sup>#</sup>, Wolfgang Rascher<sup>#</sup>, Karl F. Hilgers<sup>§</sup>, Andrea Hartner<sup>#</sup>

6 **Departments of <sup>#</sup>Pediatrics and Adolescent Medicine and <sup>§</sup>Nephrology and**  
7 **Hypertension, <sup>+</sup>Preclinical Imaging Platform Erlangen, Department of**  
8 **Radiology, University of Erlangen-Nurnberg, Erlangen, Germany**

9  
10

## 11 **Supplemental Methods**

### 12 **Peri-interventional and surgical procedures of left-sided uninephrectomy**

13 Pregnant dams were prepartally housed in individual cages. Left-sided  
14 uninephrectomy in pups was performed at day1 (UNIX d1) or day 14 (UNIX d14) of  
15 life. Animals were positioned on a heated blanket on the right side. All following steps  
16 of the surgery were performed under the microscope. Under isoflurane anesthesia  
17 and after disinfection of the surgical area intraperitoneal access was obtained by a  
18 left-sided flank incision of 7.5-10mm under aseptic conditions. The retroperitoneum  
19 was bluntly explored. After identification and careful separation of the left adrenal  
20 gland, the left kidney was mobilised and exenterated. Ureter and renal vessels were  
21 ligated by electrocautery and the left kidney was removed. The peritoneum was  
22 closed with single button sutures. For closure of the skin tissue adhesive (Histoacryl,  
23 B. Braun, Melsungen, Germany) was used. In sham operated animals the same  
24 surgical procedure was performed except for removal, the left kidney was only  
25 mobilized. For postinterventional recovery animals were left on the heated blanket  
26 until the return of spontaneous movements. Buprenorphine was applicated as a pre-  
27 emptive and postoperative analgetic in a dosage of 0.05-0.1mg/kg

28

30 **Supplemental Table 1: List of primers pairs and probes used in the study.**

|                                             | <b>forward</b>                                                                    | <b>reverse</b>                     |
|---------------------------------------------|-----------------------------------------------------------------------------------|------------------------------------|
| <b>18S</b>                                  | 5'- TTG ATT AAG TCC CTG CCC TTT GT -3'                                            | 5'- CGA TCC GAG GGC CTC ACT A -3'  |
| <b><math>\alpha</math>-SMA</b>              | 5'- TCCTGACCCTGAAGTATCCGATA -3'                                                   | 5'- GGTGCCAGATCTTTTCCATGTC -3'     |
| <b>CCL-2<br/>(MCP-1)</b>                    | 5'- CCTCCACCACTATGCAGGTCTC -3'<br>5'- TCACGCTTCTGGGCCTGTTGTTCA -3' [Probe]        | 5'- GCACGTGGATGCTACAGGC -3'        |
| <b>CCL-3<br/>(MIP-1<math>\alpha</math>)</b> | 5'- TCCTGCCACCTGCAAATCTC -3'                                                      | 5'- GCTACTTGGCAGCAAACAGCT -3'      |
| <b>CCL-5<br/>(Rantes)</b>                   | 5'- GTCGTCTTTGCTACTCGAAGGA -3'                                                    | 5'- GATGTATTCTTGAACCACTTCTTCTC -3' |
| <b>CCL-7<br/>(MCP-3)</b>                    | 5'- TGTGGGCCCAACCAGATG -3'                                                        | 5'- CTTGGAATCTTTTGTTCCTTGACA -3'   |
| <b>CCR-2</b>                                | 5'- CTGTGTGGTTGACATGCACTTAGA -3'<br>5'- AGACTCTTGAATGACACACTGCTGCGTTA -3' [Probe] | 5'- ACTCGGTCTGCTGTCTCCCTATAG -3'   |
| <b>CD2AP</b>                                | 5'- GATGAAAAATCACTGCTAGAACAGAAA -3'                                               | 5'- TTGGTAGGTGGAGTAGGCTTTTTG -3'   |
| <b>Coll I</b>                               | 5'- AGAGCGGAGAGTACTGGATCGA -3'                                                    | 5'- CTGACCTGTCTCCATGTTGCA -3'      |
| <b>Coll IV</b>                              | 5'- AACGAAAGGGACACGAGGA -3'                                                       | 5'- GGCCAGGAATACCAGGAAGT -3'       |
| <b>FN</b>                                   | 5'- TTGCAACCCACCGTGGAGTATGTG -3'                                                  | 5'- CTCGGTAGCCAGTGAGCTTAACAC -3'   |
| <b>IFN<math>\gamma</math></b>               | 5'- GCCAAGTTCGAGGTGAACAAC -3'<br>5'- CCAGCACAAAGCTGTCAATGAACTCATCA -3' [Probe]    | 5'- TAGATTCTGGTGACAGCTGGTGAA -3'   |
| <b>IL-6</b>                                 | 5'- GCCCTTCAGGAACAGCTATGA -3'                                                     | 5'- TGTAACAACATCAGTCCCAAGA -3'     |
| <b>KIM-1</b>                                | 5'- ATAATCACACTGTAAGAATCCCTTTGAG -3'                                              | 5'- CAACGGACATGCCAACATAGA -3'      |
| <b>MMP-2</b>                                | 5'- CCCGACCAAGGATATAGCCTATT -3'                                                   | 5'- CGGAAGTTCTTGGTGTAGGTGTAGA -3'  |
| <b>Nephrin</b>                              | 5'- GGGGACCCCTCTATGATGAA -3'                                                      | 5'- GTGAAGCGTCTCACACCAGA -3'       |
| <b>NEPH1</b>                                | 5'- CCCCCTCCGGATCGAA -3'                                                          | 5'- TGTCCCCACCTCTAGGAAGTTC -3'     |
| <b>NGAL</b>                                 | 5'- TCACCCTGTACGGAAGAACCA -3'                                                     | 5'- ACTTGGCAAAGCTGACGAATC -3'      |
| <b>OPN</b>                                  | 5'- AAAGTGGCTGAGTTTGGCAG -3'                                                      | 5'- AAGTGGCTACAGCATCTGAGTGT -3'    |

5'- TCAGAGGAGAAGGCGCATTACAGCA -3' [Probe]

|                 |                                                                                 |                                   |
|-----------------|---------------------------------------------------------------------------------|-----------------------------------|
| <b>PAI-1</b>    | 5'- GTTCACTCCGGATGGG -3'                                                        | 5'- TGGTAGGGCAGTTCCAGGAT -3'      |
| <b>PECAM</b>    | 5'- TCCACGCCGGGAAGTACA -3'                                                      | 5'- TCAATTGTGGTTTTTTCCTTGCT -3'   |
| <b>Podocin</b>  | 5'- TCTTGCCTCTCCTCCCTGA -3'                                                     | 5'- AGACGGAGGTCAACCTTGTG -3'      |
| <b>Renin</b>    | 5'- GCTACATGGAGAATGGGACTGAA -3'<br>5'- CCATCCACTATGGATCAGGGAAGGTCAA -3' [Probe] | 5'- ACCACATCTTGGCTGAGGAAAC -3'    |
| <b>TGFβ-1</b>   | 5'- TGGAAGTGGATCCACGCGCCCAAGG -3'                                               | 5'- GCAGGAGCGCACGATCATGTTGGAC -3' |
| <b>TGFβ-2</b>   | 5'- CATCCCGCCCACTTTCTACA -3'                                                    | 5'- ACATCGAAGCGGACGATTCT -3'      |
| <b>TIMP-1</b>   | 5'- GATATGTCCACAAGTCCCAGAACC -3'                                                | 5'- CCACAGCCAGCACTATAGGTCTTT -3'  |
| <b>TIMP-2</b>   | 5'- GCTGGACGTTGGAGGAAAGA -3'<br>5'- TCTCCTCCGCCTCCCTGCAATTAGA -3' [Probe]       | 5'- GCACAATAAAGTCACAGAGGGTAAT -3' |
| <b>TNFα</b>     | 5'- ATGGGCTCCCTCTCATCAGT -3'                                                    | 5'- GCTTGGTGGTTTGCTACGAC -3'      |
| <b>Umod</b>     | 5'- TGCTCTTACCCTCTGGACATGA -3'                                                  | 5'- AAGCTGATGTTCAAGGCACTAACC -3'  |
| <b>VEGF-A</b>   | 5'- AACGAAAGCGCAAGAAATCC -3'                                                    | 5'- GCTCACAGTGAACGCTCCAG -3'      |
| <b>VEGF-R1</b>  | 5'- CGACACTCTTTTGGCTCCTTCTAAC -3'                                               | 5'- TGACAGGTAGTCCGTCTTTACTTCG -3' |
| <b>Vimentin</b> | 5'- GAGTCAAACGAATACCGGAGACA -3'                                                 | 5'- CCAGGGACTCATTAGTGCCTTT -3'    |

**Supplemental Table 2: Markers of renal fibrosis and capillarisation at 52 weeks of age. n=8 for UNX d1, n=7 for UNX d14, n=8 for controls. Data are expressed as mean  $\pm$  standard error of the mean. P-values were obtained from Bonferroni's post hoc-test following one-way ANOVA.**

|                                             | control         | UNX d1          | p-value UNX d1 vs control | UNX d14         | p-value UNX d1 vs control | p-value UNXd1 vs UNXd14 |
|---------------------------------------------|-----------------|-----------------|---------------------------|-----------------|---------------------------|-------------------------|
| Tubuloint. Collagen IV expansion [%]        | 13.4 $\pm$ 1.31 | 12.9 $\pm$ 0.62 | > 0.99                    | 11.6 $\pm$ 1.13 | 0.77                      | > 0.99                  |
| $\alpha$ -SMA-pos. interst. Cells [no/view] | 59.5 $\pm$ 3.42 | 55.0 $\pm$ 3.63 | > 0.99                    | 55.9 $\pm$ 4.07 | > 0.99                    | > 0.99                  |
| Vimentin mRNA [fold induction]              | 1.00 $\pm$ 0.08 | 1.65 $\pm$ 0.34 | 0.23                      | 1.68 $\pm$ 0.26 | 0.22                      | > 0.99                  |
| $\alpha$ -SMA mRNA [fold induction]         | 1.00 $\pm$ 0.07 | 1.24 $\pm$ 0.27 | > 0.99                    | 1.20 $\pm$ 0.08 | > 0.99                    | > 0.99                  |
| Collagen IV mRNA [fold induction]           | 1.00 $\pm$ 0.08 | 1.62 $\pm$ 0.34 | > 0.99                    | 1.4 $\pm$ 0.17  | 0.25                      | 0.80                    |
| Fibronectin mRNA [fold induction]           | 1.00 $\pm$ 0.10 | 2.31 $\pm$ 0.62 | 0.10                      | 1.56 $\pm$ 0.17 | 0.72                      | 0.51                    |
| PAI-1 mRNA [fold induction]                 | 1.00 $\pm$ 0.15 | 1.58 $\pm$ 0.63 | 0.88                      | 0.94 $\pm$ 0.09 | > 0.99                    | 0.79                    |
| TIMP-1 mRNA [fold induction]                | 1.00 $\pm$ 0.16 | 2.27 $\pm$ 0.57 | <b>0.048</b>              | 1.88 $\pm$ 0.32 | 0.16                      | 0.50                    |
| TIMP-2 mRNA [fold induction]                | 1.00 $\pm$ 0.13 | 1.13 $\pm$ 0.21 | 0.93                      | 1.07 $\pm$ 0.09 | 0.98                      | 0.99                    |
| MMP-2 mRNA [fold induction]                 | 1.00 $\pm$ 0.39 | 1.82 $\pm$ 0.53 | 0.46                      | 1.44 $\pm$ 0.17 | 0.73                      | 0.73                    |
| Tubuloint. RECA-pos. capillaries [no/view]  | 5.56 $\pm$ 1.41 | 8.73 $\pm$ 2.31 | 0.70                      | 11.7 $\pm$ 2.84 | 0.22                      | 0.74                    |
| PECAM mRNA [fold induction]                 | 1.00 $\pm$ 0.13 | 0.69 $\pm$ 0.05 | 0.09                      | 0.74 $\pm$ 0.08 | 0.23                      | > 0.99                  |
| VEGF-A mRNA [fold induction]                | 1.00 $\pm$ 0.06 | 0.80 $\pm$ 0.06 | 0.14                      | 0.97 $\pm$ 0.09 | > 0.99                    | > 0.32                  |
| VEGF-R1 mRNA [fold induction]               | 1.00 $\pm$ 0.10 | 0.90 $\pm$ 0.10 | > 0.99                    | 1.07 $\pm$ 0.16 | > 0.99                    | > 0.99                  |

**Supplemental Table 3: Markers of renal inflammation at 52 weeks of age. n=8 for UNX d1, n=7 for UNX d14, n=8 for controls. Data are expressed as mean  $\pm$  standard error of the mean. P-values were obtained from Bonferroni's post hoc-test following one-way ANOVA.**

|                                      | control         | UNX d1          | p-value UNX d1<br>vs control | UNX d14         | p-value UNX d14<br>vs control | p-value UNX d1<br>vs UNX d14 |
|--------------------------------------|-----------------|-----------------|------------------------------|-----------------|-------------------------------|------------------------------|
| CCL2 (MCP-1) mRNA [fold induction]   | 1.00 $\pm$ 0.18 | 1.89 $\pm$ 0.58 | 0.26                         | 0.88 $\pm$ 0.12 | 0.99                          | 0.25                         |
| CCL3 (MIP-1a) mRNA [fold induction]  | 1.00 $\pm$ 0.21 | 0.99 $\pm$ 0.27 | > 0.99                       | 1.03 $\pm$ 0.17 | > 0.99                        | > 0.99                       |
| CCL5 (Rantes) mRNA [fold induction]  | 1.00 $\pm$ 0.19 | 0.95 $\pm$ 0.11 | 0.99                         | 0.78 $\pm$ 0.09 | 0.63                          | 0.78                         |
| CCL7 (MCP-3) mRNA [fold induction]   | 1.00 $\pm$ 0.12 | 2.55 $\pm$ 0.82 | 0.22                         | 1.83 $\pm$ 0.62 | > 0.99                        | > 0.99                       |
| CCR2 mRNA [fold induction]           | 1.00 $\pm$ 0.31 | 2.05 $\pm$ 0.54 | 0.38                         | 1.81 $\pm$ 0.49 | > 0.99                        | 0.73                         |
| Osteopontin mRNA [fold induction]    | 1.00 $\pm$ 0.21 | 7.99 $\pm$ 2.16 | <b>0.04</b>                  | 7.72 $\pm$ 2.18 | > 0.06                        | > 0.99                       |
| IL-6 mRNA [fold induction]           | 1.00 $\pm$ 0.17 | 6.37 $\pm$ 3.43 | 0.29                         | 3.77 $\pm$ 1.96 | 0.80                          | > 0.83                       |
| TNF $\alpha$ mRNA [fold induction]   | 1.00 $\pm$ 0.13 | 1.39 $\pm$ 0.33 | 0.64                         | 1.23 $\pm$ 0.24 | 0.91                          | 0.96                         |
| TGF- $\beta$ 1 mRNA [fold induction] | 1.00 $\pm$ 0.07 | 1.75 $\pm$ 0.42 | 0.25                         | 1.56 $\pm$ 0.24 | 0.51                          | 0.96                         |
| TGF- $\beta$ 2 mRNA [fold induction] | 1.00 $\pm$ 0.10 | 1.68 $\pm$ 0.30 | 0.27                         | 1.59 $\pm$ 0.36 | 0.41                          | 0.99                         |
| IFN $\gamma$ mRNA [fold induction]   | 1.00 $\pm$ 0.39 | 1.06 $\pm$ 0.15 | > 0.99                       | 1.01 $\pm$ 0.18 | > 0.99                        | > 0.99                       |

**Supplemental Figure 1**

Exemplary photomicrographs of WT-1 (marker for podocytes) and RECA (marker for endothelial cells) stainings in renal sections of rats at the age of 52 weeks.

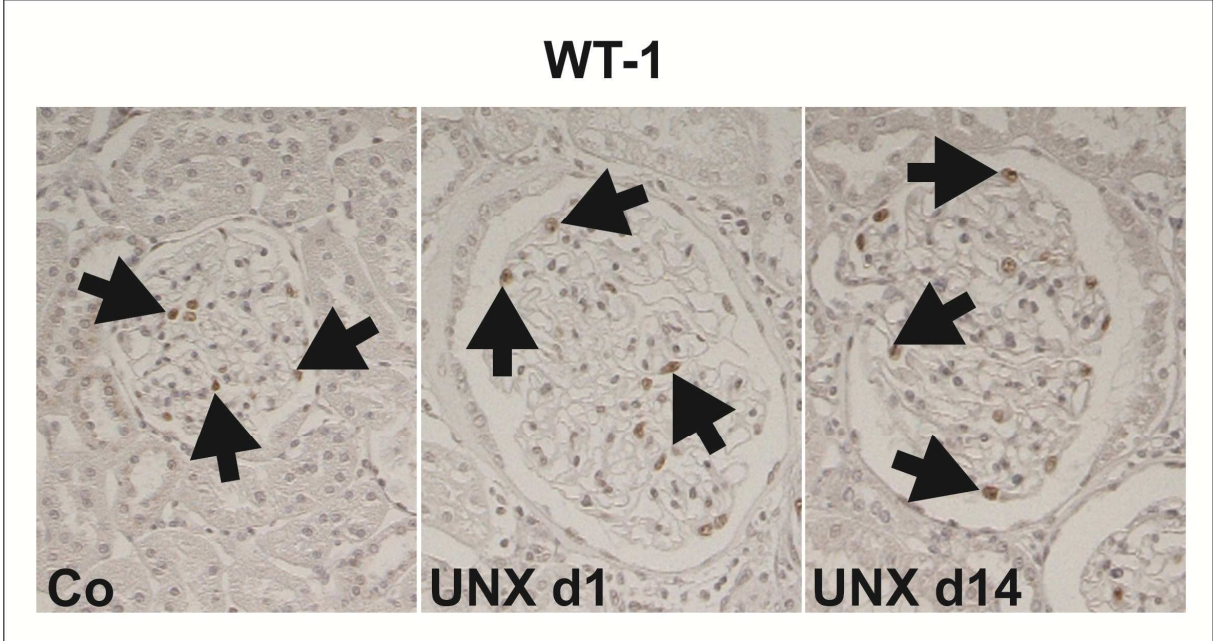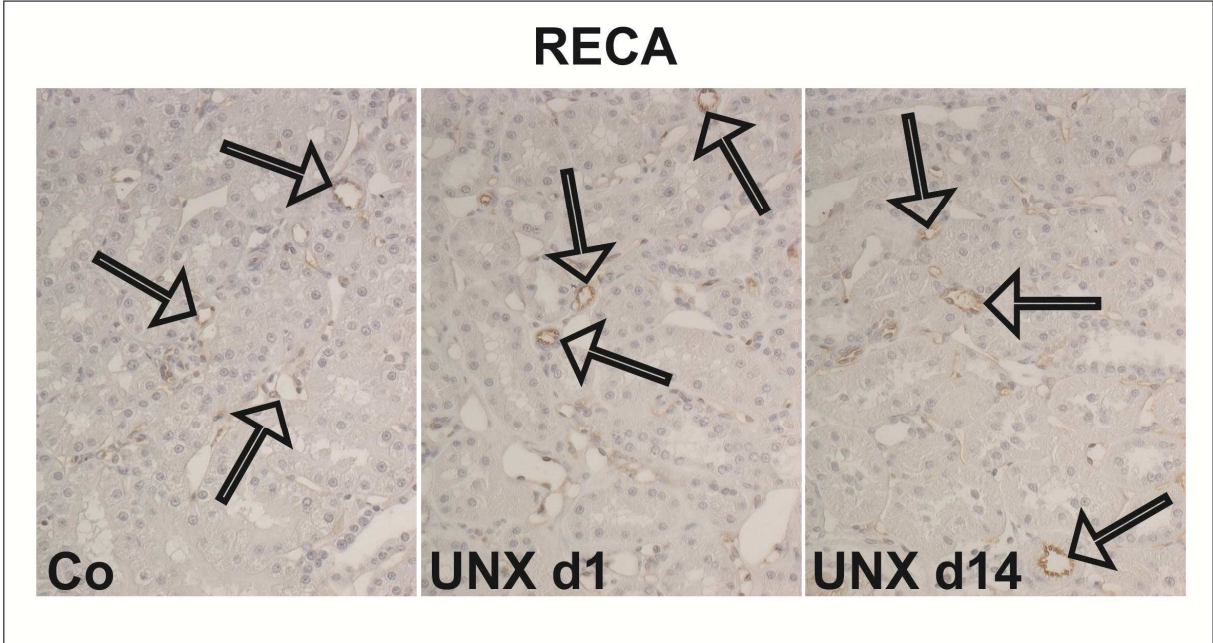

## Supplemental Figure 2

A: Exemplary MR image of a glomerular ferritin labeled kidney before (left) and after (right) plugin assisted glomerular quantification. Glomerular labelling was obtained using cationized ferritin as described previously<sup>1,2</sup>. In short, rats obtained a fractional application of 3.3mg/100g cationized horse spleen ferritin (Sigma-Aldrich Chemicals, Munich, Germany) by 4 bolus injections in the tail vein. Retrograde perfusion was performed in deep anesthesia with NaCl 0.9% for 10 minutes and with paraformaldehyde for 5 minutes under a pressure of 200mmHg. Kidneys were weighted, the peri-renal capsules were removed and organs were embedded in 1.5% agarose and measured in a 7 Tesla Magnetic Resonance Tomograph (ClinScan, Bruker, Ettlingen, Germany) using a T1 weighted 3D Fast Low Angle Shot Sequence adapted from<sup>1</sup> with following parameters: time to repetition = 50 ms, time to echo = 7.8 ms, Flip angle = 15 °, 7 averages, acquisition time about 8 hours, base matrix = 704 x 704, field of view = 30 mm x 30 mm and a slice thickness of 0.13 mm.

B: Quantification of absolute glomerular numbers in glomerular ferritin labeled kidneys of rats after uninephrectomy at day 1 (UNX d1, n=5), day 14 (UNX d14, n=4) and day 42 (UNX d42, n=5) of life. A plugin of Chimaera GmbH (Erlangen, Germany) for Aycan Osirix Software (Aycan Digitalsysteme GmbH, Würzburg, Germany) was used to segment the hypointense glomeruli in contrast to the surrounding kidney tissue. Finally, the number of segmentated regions were counted as a measure for the number of glomeruli.

C: Exemplary photomicrograph of ferritin staining in a glomerular ferritin labeled kidney. As a control glomerular ferritin depositions were visualized with an antibody to ferritin (F6136, Sigma-Aldrich Chemicals, Munich, Germany) on frozen renal sections from ferritin-infused rats at a dilution of 1:1000.



References:

- 1 Chacon-Caldera, J. *et al.* Fast glomerular quantification of whole ex vivo mouse kidneys using Magnetic Resonance Imaging at 9.4 Tesla. *Z Med Phys* **26**, 54-62, doi:10.1016/j.zemedi.2015.12.008 (2016).
- 2 Bennett, K. M. *et al.* MRI of the basement membrane using charged nanoparticles as contrast agents. *Magnetic resonance in medicine* **60**, 564-574, doi:10.1002/mrm.21684 (2008).

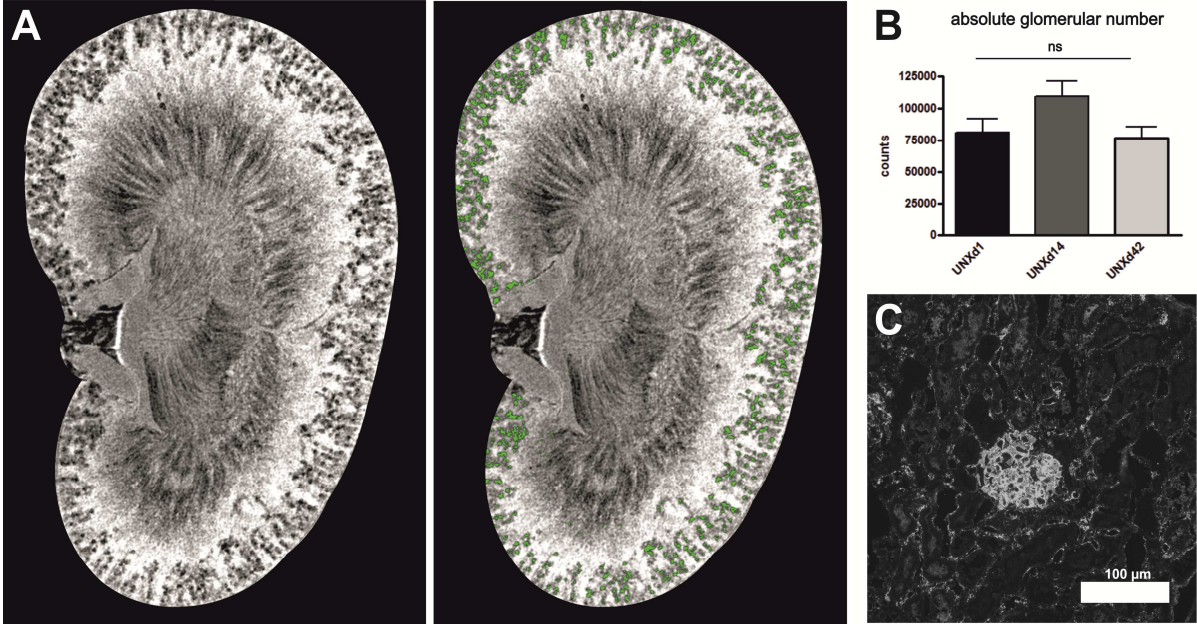

Supplement: 41598_2018_22733_MOESM1_ESM.pdf [file 41598_2018_22733_MOESM1_ESM.pdf]
